# Supplementary material
Source: Springer Nature journal article supplement (https://www.springermedizin.de/resource/supplementary/12913_2014_3473_MOESM2_ESM.pdf/9532906)

### A: Number of Individuals

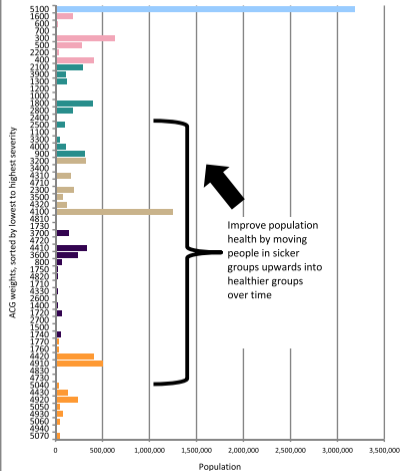

### B: Total System Cost

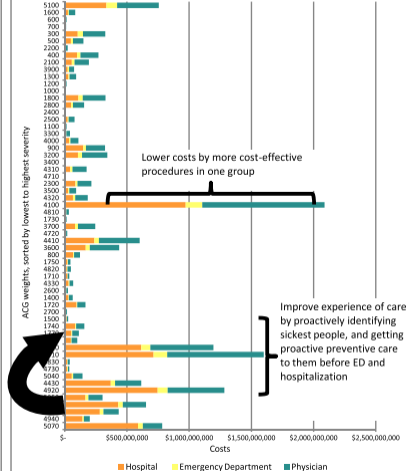

### C: Mean Cost per Individual

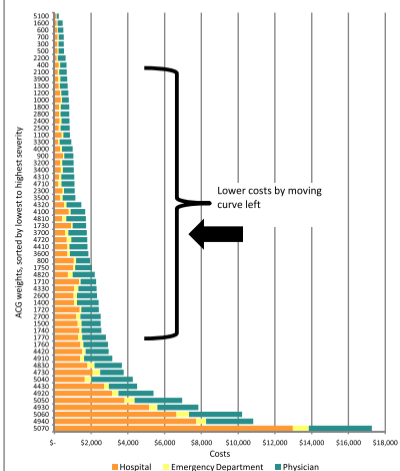

Supplement: MOESM2 [file 9532906]
